# Supplementary material
Source: PubMed Central journal article supplement (PMC3191035)
Supplement: supp_M111.245225_jbc.M111.245225-1.pdf [file supp_M111.245225_jbc.M111.245225-1.pdf]

## Supplemental data

### Crystal Structure of H<sub>2</sub>O<sub>2</sub>-Dependent Cytochrome P450<sub>SP $\alpha$</sub> with Its Bound Fatty Acid Substrate: Insight into the Regioselective Hydroxylation of Fatty Acids at the $\alpha$ -Position

Takashi Fujishiro, Osami Shoji, Hiroshi Sugimoto, Shingo Nagano, Yoshitsugu Shiro, Yoshihito Watanabe

#### MATERIALS AND METHODS

##### *Materials.*

All chemical reagents were purchased from commercial sources and used without further purification.  $\delta$ -aminolevulinic acid hydrochloride and DNase I (20 U/ $\mu$ L) were purchased from Cosmo Bio Co., Ltd (Tokyo, Japan) and Roche Diagnostics K. K. (Basel, Switzerland), respectively. *N*, *O*-bis(trimethylsilyl)trifluoroacetamide (BSTFA) and 9-anthryldiazomethane (ADAM) were obtained from Tokyo Chemical Industry Co. (Tokyo, Japan) and Funakoshi Co., Ltd (Tokyo, Japan), respectively. 2-(*N*-morpholino)ethanesulfonic acid (MES) was purchased from Dojindo Laboratories (Kumamoto, Japan). 4-(2-hydroxyethyl)-1-piperazineethanesulfonic acid (HEPES), ( $\pm$ )-2-methyl-2,4-pentanediol (MPD), thrombin, 12-hydroxydodecanoic acid (12-OH C<sub>12</sub>), myristic acid (C<sub>14</sub>),  $\alpha$ -hydroxymyristic acid ( $\alpha$ -OH C<sub>14</sub>), and  $\beta$ -hydroxymyristic acid ( $\beta$ -OH C<sub>14</sub>) were purchased from Sigma-Aldrich Co., (St. Louis, MO). H<sub>2</sub>O<sub>2</sub>, dithiothreitol (DTT), ethylene glycol, sodium dodecyl sulfate (SDS), cholic acid, isopropyl- $\beta$ -D-thiogalactopyranoside (IPTG), kanamycin sulfate, and reduced glutathione were obtained from WAKO Pure Chemical Industries, Ltd (Osaka, Japan). The following chemicals were purchased from Nacalai Tesque Inc. (Kyoto, Japan): trimethylchlorosilane (TMCS), glycerol, potassium chloride, tris(hydroxymethyl)aminomethane, urea, hydrochloric acid, phosphoric acid, K<sub>2</sub>HPO<sub>4</sub>, ampicillin sodium salt, lysozyme, and phenylmethylsulfonyl fluoride.

##### *Preparation of recombinant forms of P450<sub>SP $\alpha$</sub> .*

A recombinant enzyme of P450<sub>SP $\alpha$</sub>  (S1, S2) was expressed in *Escherichia coli* BL21 as previously reported with some modification. The transformed *E. coli* cells were cultivated in LB medium supplemented with 100 mg/ml ampicillin at 27 °C. At log phase,  $\delta$ -aminolevulinic acid was added at OD<sub>600</sub> = 0.7–0.8 to a final concentration of 0.5 mM. For expression of the recombinant enzyme of P450<sub>SP $\alpha$</sub> , IPTG was added to a final concentration of 0.1 mM at OD<sub>600</sub> = 1.0–1.2 and the cultivation proceeded at 20 °C for 20 h. The harvested cells were collected by centrifugation and stored at –80 °C. The frozen cells were resuspended in 0.1 M Tris-HCl buffer (pH 7.5) containing 20%(v/v) ethylene glycol, 1 mM DTT, 1%(w/v) cholic acid, 0.1%(w/v) SDS, 1 mM EDTA, 0.1 mM phenylmethylsulfonyl fluoride containing 1 mg/ml lysozyme, and 140 U/100 ml DNase I. After sonication of the suspended cells, the supernatant was collected by centrifugation and diluted in two volumes of 0.1 M Tris-HCl buffer (pH 7.5) containing 20%(v/v) ethylene glycol and 1 mM DTT. The

diluted solution was loaded on a glutathione–sepharose column (GE Healthcare UK Ltd, Little Chalfont, UK) and the column was washed with 0.1 M Tris-HCl buffer (pH 7.5) containing 20%(v/v) ethylene glycol, 1 mM DTT, 0.3%(w/v) cholic acid, and 0.03%(w/v) SDS. Glutathione *S*-transferase (GST)-fusion P450<sub>SP $\alpha$</sub>  was eluted with 0.1 M Tris-HCl buffer (pH 7.5) containing 20%(v/v) ethylene glycol, 1 mM DTT, 0.3%(w/v) cholic acid, 0.03%(w/v) SDS, 1.5 M urea, and 5 mM reduced glutathione. Thrombin cleavage of GST-fusion P450<sub>SP $\alpha$</sub>  was performed during dialysis against 0.1 M potassium phosphate buffer (pH 7.0) containing 0.3 M KCl and 20%(v/v) glycerol at 4 °C for 15 h. The reaction mixture was passed through a glutathione Sepharose column and a benzamidine Sepharose column (GE Healthcare UK Ltd) to separate GST and thrombin from P450<sub>SP $\alpha$</sub> , respectively. The fractions were collected and concentrated to less than 5 ml by centrifugation using Amicon Ultra filter units (Millipore, Co., Cork, Ireland). The concentrated sample was loaded onto an S-200 Sephacryl HR column (GE Healthcare UK Ltd) for size exclusion chromatography. The purity of P450<sub>SP $\alpha$</sub>  was estimated using SDS-PAGE and the concentration of P450<sub>SP $\alpha$</sub>  was determined using CO difference spectra (S3, S4). All mutants were prepared according to the procedure used for the WT. The substrate free-form of P450<sub>SP $\alpha$</sub>  was prepared by removing fatty acids originating from *E. coli* cells. P450<sub>SP $\alpha$</sub>  was passed thorough Hydroxyalkoxypropyl-Dextran, Type VI (Sigma-Aldrich, Co., USA) column equilibrated with 0.1 M potassium phosphate buffer (pH 7.0) at room temperature, followed by dialysis against 0.1 M potassium phosphate buffer (pH 7.0) containing 0.3 M KCl and 20%(v/v) glycerol. The amount of fatty acids after the column chromatography was estimated to be less than 3% ( $[\text{Fatty acid}]/[\text{P450}_{\text{SP}\alpha}] \times 100$ ) by gas chromatography according to the previously reported procedure. (S5)

*Preparation of P450<sub>SP $\alpha$</sub>  and P450<sub>BS $\beta$</sub>  mutants.*

Site-directed mutagenesis of P450<sub>SP $\alpha$</sub>  was performed according to the instruction manual of the QuikChange Site-Directed Mutagenesis kit (Stratagene, La Jolla, CA) using pGEX-AX2 plasmids containing the gene of P450<sub>SP $\alpha$</sub>  WT as templates (S2). The mutagenic primers were (mutated codons are underlined and capitalized) 5'-cagaagacactgTTTggccaagcg-3' (sense) and 5'-cgccgccttgccAAAcagtgtctc-3' (antisense) for P450<sub>SP $\alpha$</sub>  L78F, 5'-gcgctgttcgacgcTTCggctc-3' (sense) and 5'-ctcgccgagccGAAggcgtcg-3' (antisense) for P450<sub>SP $\alpha$</sub>  A172F, and 5'-attctatcccttcGGTcccgtgtgtg-3' (sense) and 5'-caccacagcgggACCgaaggatagaa-3' (antisense) for P450<sub>SP $\alpha$</sub>  F288G. Expression and purification of the P450<sub>SP $\alpha$</sub>  mutants were performed as described above. Site-directed mutagenesis of P450<sub>BS $\beta$</sub>  was performed in the same manner for the P450<sub>SP $\alpha$</sub>  mutants using pQE30tBS $\beta$  WT (S6) and P450<sub>BS $\beta$</sub>  F79L (S7) plasmids as templates. The mutagenic primers for the G290F mutant of P450<sub>BS $\beta$</sub>  were 5'-ccgcagatattatccgttcTTCccgttttagg-3' (sense) and 5'-gcgcccctaaaaacggGAAgaacgg-3' (antisense). Expression and purification of the P450<sub>BS $\beta$</sub>  mutants were performed as previously reported.

## References

- S1.** Matsunaga, I., Yokotani, N., Gotoh, O., Kusunose, E., Yamada, M., and Ichihara, K. (1997) *J. Biol. Chem.* **272**, 23592–23596
- S2.** Matsunaga, I., Sumimoto, T., Kusunose, E., and Ichihara, K. (1998) *Lipids* **33**, 1213–1216
- S3.** Omura, T. and Sato, R. (1964) *J. Biol. Chem.* **239**, 2370–2378
- S4.** Gunsalus, I. C., Wagner, G. C., (1978) *Methods Enzymol.* **52**, 166–188.
- S5.** Shoji, O., Fujishiro, T., Nagano, S., Tanaka, S., Hirose, T., Shiro, Y., and Watanabe, Y. (2010) *J. Biol. Inorg. Chem.* **15**, 1331-1339
- S6.** Matsunaga, I., Ueda, A., Sumimoto, T., Ichihara, K., Ayata, M., and Ogura, H. (2001) *Arch. Biochem. Biophys.* **394**, 45–53
- S7.** Lee, D.-S., Yamada, A., Sugimoto, H., Matsugana, I., Ogura, H., Ichihara, K., Adachi, S.-i., Park, S.-Y., and Shiro, Y. (2003) *J. Biol. Chem.* **278**, 9761–9767

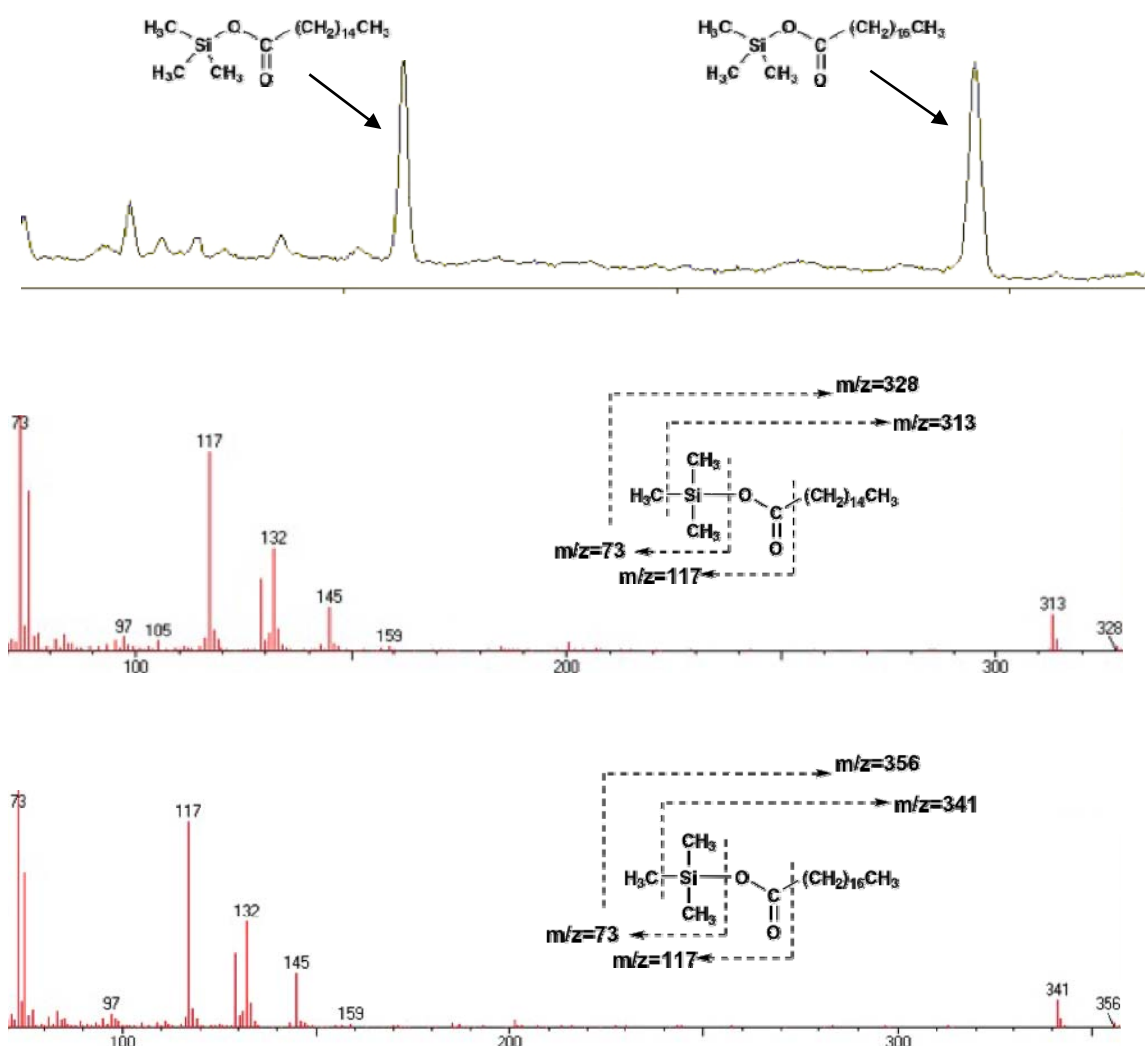

**Figure S1.** GC/MS analysis of the extracts of P450<sub>SPα</sub> WT. A, GC chromatogram. The peaks of the extracted palmitic acid and stearic acid derivatives are indicated by arrows with their chemical structures. B, Mass spectrum of the palmitic acid derivative. C, Mass spectrum of the stearic acid derivative.

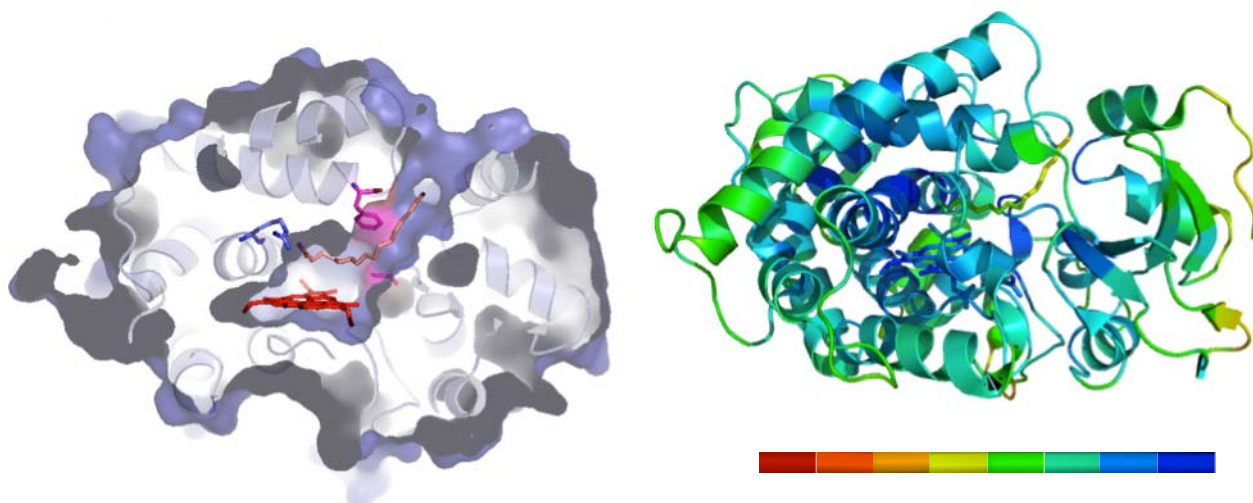

**Figure S2.** The substrate access channel of P450<sub>BSβ</sub>. *A*, The substrate access channel of P450<sub>BSβ</sub>. Heme, palmitic acid, Phe-173, and Gly-290 are represented as *stick models*. *B*, *B*-factor of P450<sub>BSβ</sub>.

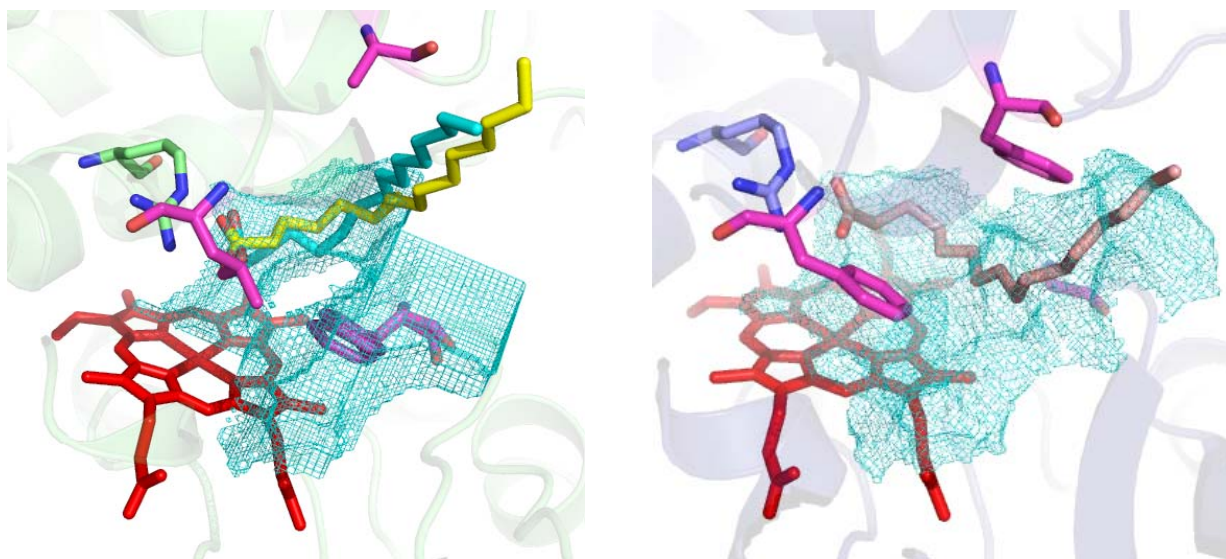

**Figure S3.** The active site structures of P450<sub>SPα</sub> (*A*) and P450<sub>BSβ</sub> (*B*). Palmitic acid, heme, Arg-241 of P450<sub>SPα</sub>, and Arg-242 of P450<sub>BSβ</sub> are represented as *red, cyan and yellow, pink, green, and blue* stick models, respectively. Leu-78, Ala-172, and Phe-288 of P450<sub>SPα</sub> and Phe-79, Phe-173, and Gly-290 of P450<sub>BSβ</sub> are represented as *magenta* stick models. The active site cavities were calculated using VOIDOO and are shown in *light-blue* mesh.

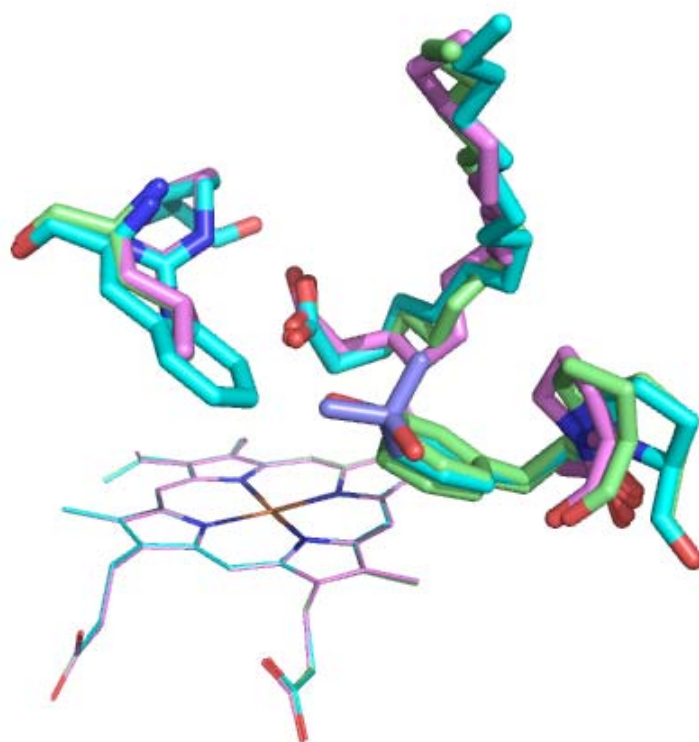

**Figure S4.** Comparison of WT (green), L78F (purple), and F288G (cyan). Superimposition of two mutants and WT P450<sub>SP $\alpha$</sub> . A, Side view from the propionate of the heme. Heme is represented as a line. MPD in F288G is represented as a blue stick model.

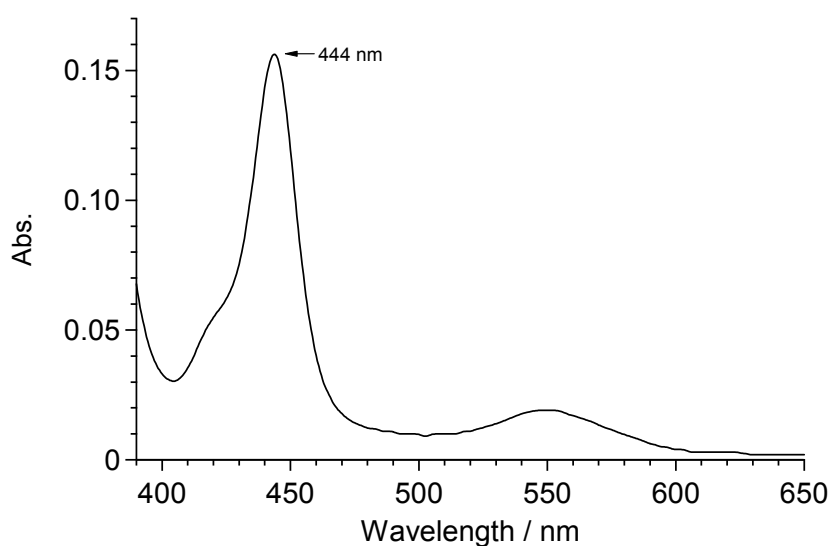

**Fig. S5.** UV-visible absorption spectra of the ferrous-CO bound form of P450<sub>SP $\alpha$</sub>  in 0.1 M potassium phosphate buffer (pH 7.0) containing 0.3 M KCl, 20%(v/v) glycerol, and sodium dithionite. The buffer was saturated with carbon monoxide (CO). The concentration of P450<sub>SP $\alpha$</sub>  was 1.3  $\mu$ M.
